# Supplementary material for: Gene expression analyses determine two different subpopulations in KIT-negative GIST-like (KNGL) patients
Source: PubMed Central journal article supplement (PMC5915139; doi:10.18632/oncotarget.24799), 2018-04-03
Supplement: oncotarget-09-17576-s001.pdf [file oncotarget-09-17576-s001.pdf]

## Gene expression analyses determine two different subpopulations in KIT-negative GIST-like (KNGL) patients

### SUPPLEMENTARY MATERIALS

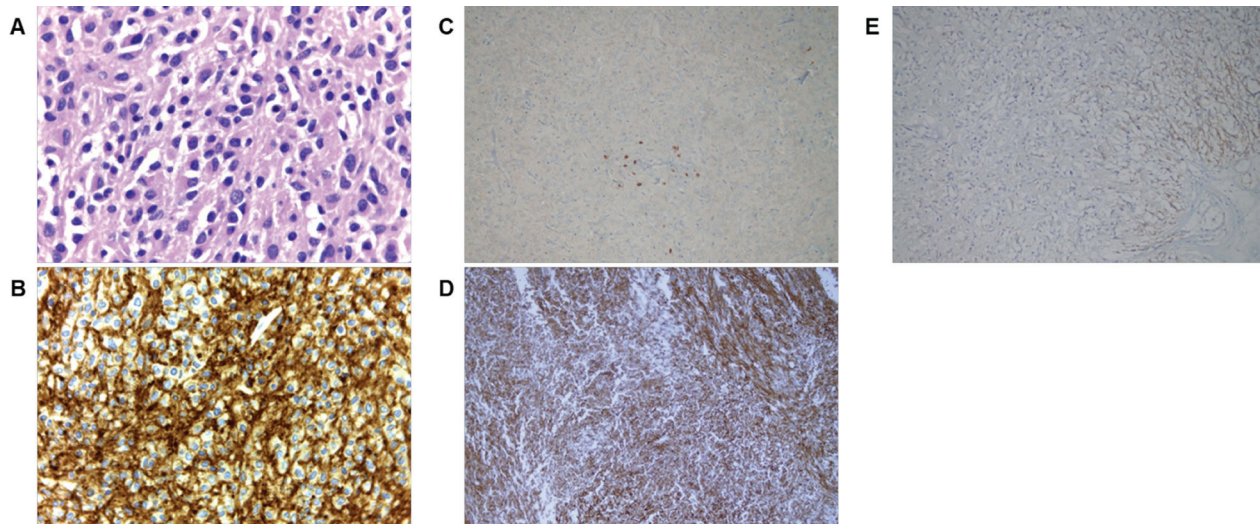

**Supplementary Figure 1:** Epithelioid GIST: (A) Tumor cells with abundant eosinophilic cytoplasm and nuclear atypia (H&E 20×). (B) Strong membranous and cytoplasmic immunoreactivity for DOG1 (20×). (C) C-Kit negative immunostaining, with mastocytes stained positively with c-Kit (10×). (D) GIST c-Kit positive (10×). (E) KNGL with less than 10% of c-Kit immunostaining (10×).

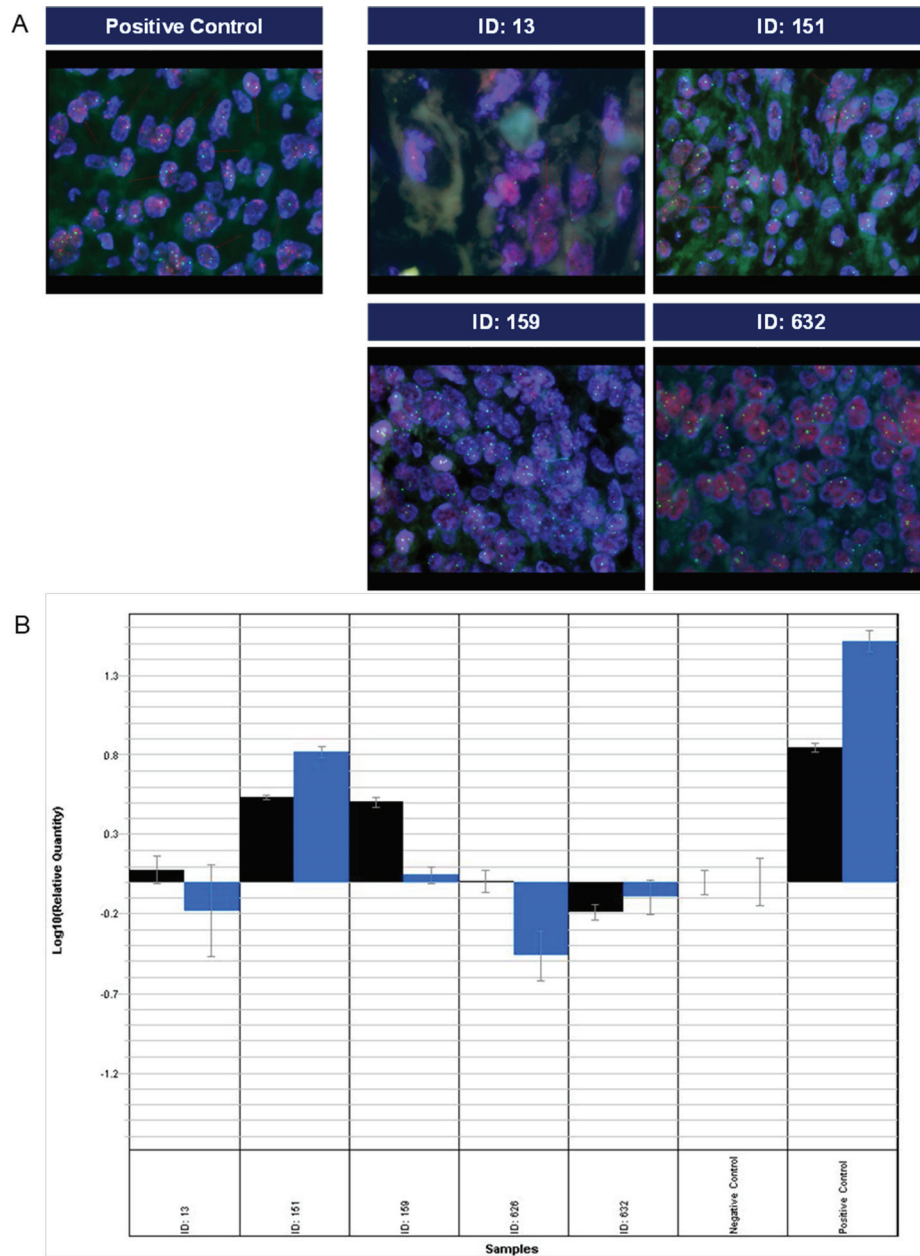

**Supplementary Figure 2: (A)** Amplification of *MDM2* was performed, by FISH in 4 KNGL cases. A dedifferentiated liposarcoma was used as positive control. Case with ID: 151 showed positive amplification of *MDM2*. **(B)** The expression levels of *CDK4* and *MDM2*, of 5 KNGL cases, were analyzed by qRT-PCR. A dedifferentiated liposarcoma was used as positive control and a KIT-positive GIST was used as negative control and reference. Moderate expression of both genes was determined in case with ID: 151.

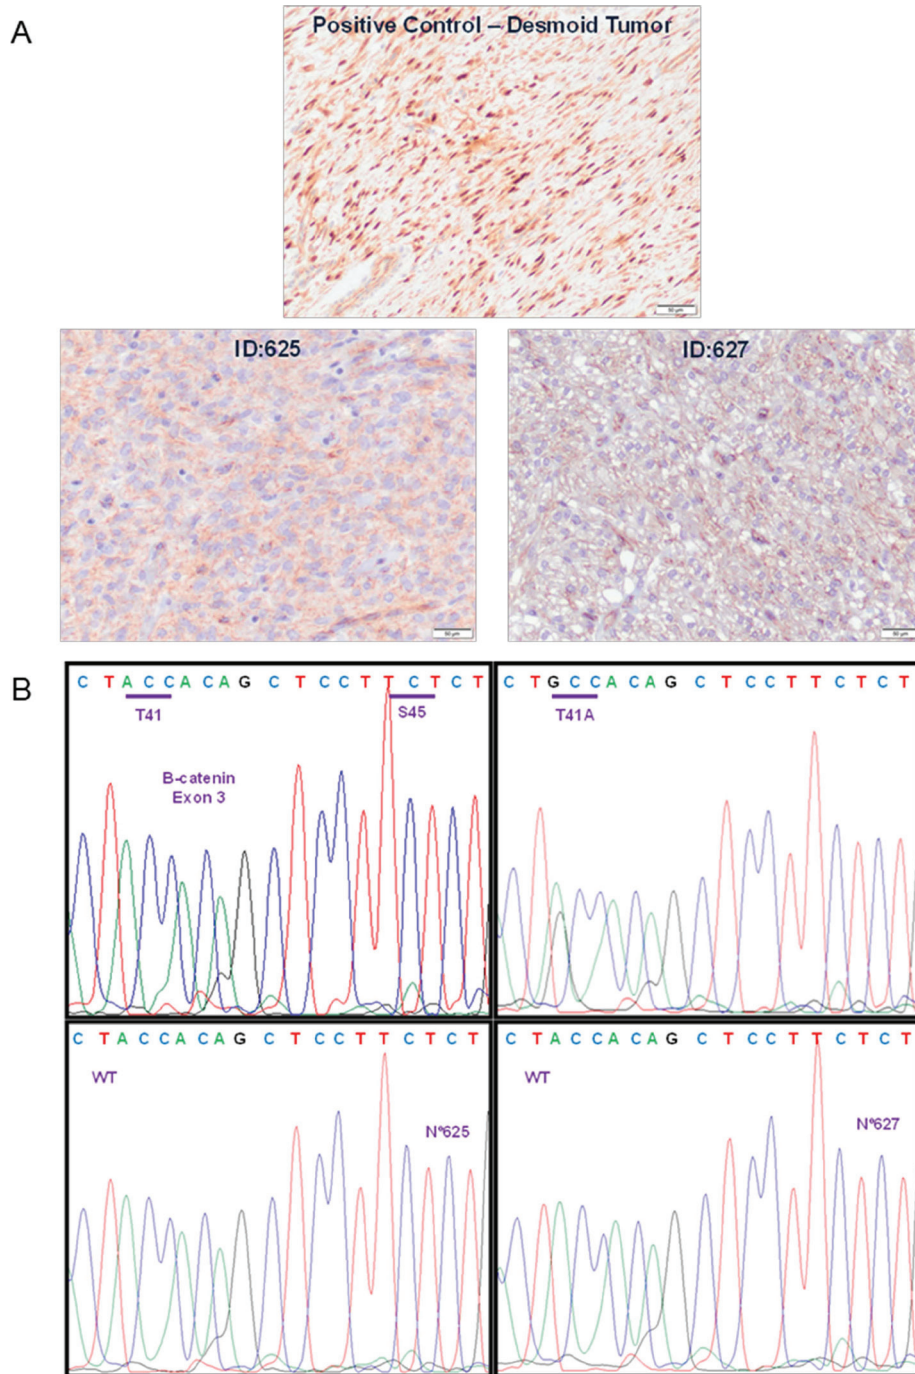

**Supplementary Figure 3:** (A) B-Catenin cytoplasmic localization by immunohistochemistry, of case 625 (down-left) and case 627 (down-right). A diagnosed desmoid tumor was used as positive control (up) – nuclear  $\beta$ -catenin (B) *CTNNB1* mutations analysis, by Sanger Sequencing, of case 625 (down-left) and case 627 (down-right). A diagnosed desmoid tumor was used as positive control (up-right). Wild type (WT)  $\beta$ -Catenin gene sequence is also represented (up-left).

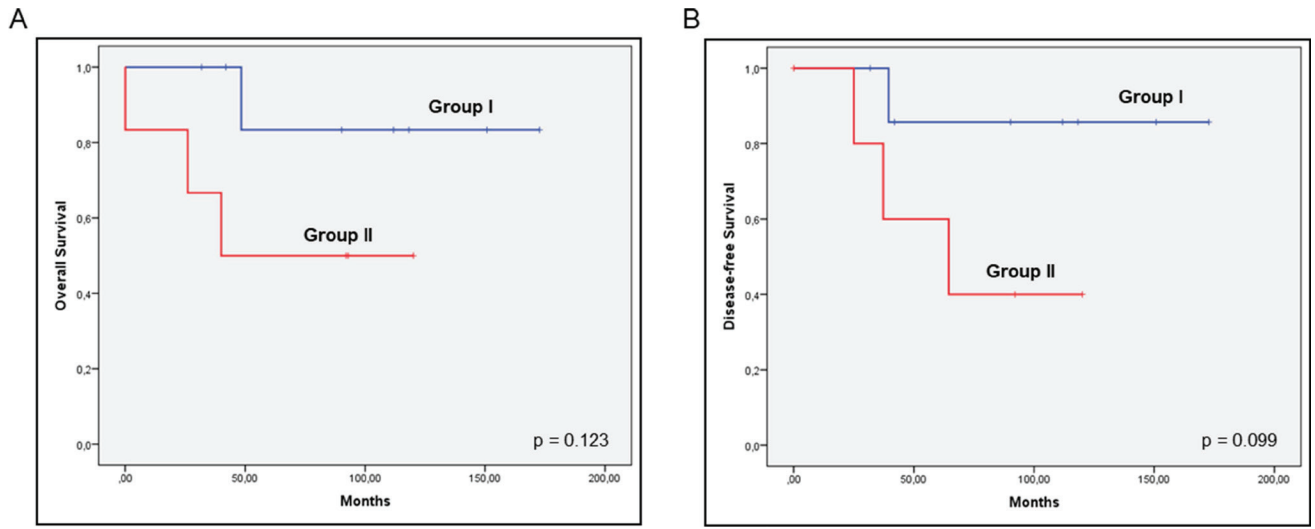

**Supplementary Figure 4: Survival analysis taking into consideration only *KIT* and *PDGFRA* mutated cases. Group I ( $n = 8$ ) and Group II ( $n = 6$ ).**

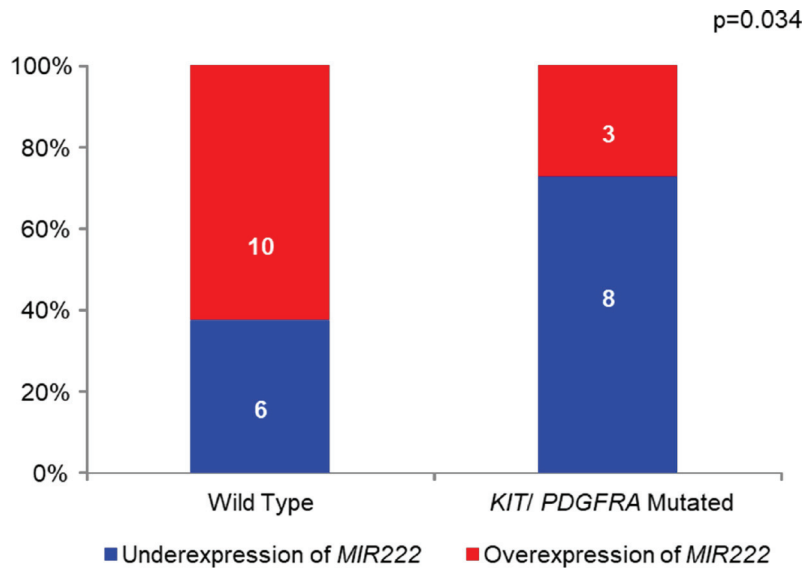

**Supplementary Figure 5: Mutational analyses according to miR221-222 expression.**

**Supplementary Table 1: Influence of miRNA221/ 222 expression and clinical data**

|                                      |         |          |       |          |           |       |
|--------------------------------------|---------|----------|-------|----------|-----------|-------|
| <b>Cellularity:</b>                  |         |          | 0.24  |          |           | 0.26  |
| Normal                               | 6 (75%) | 10 (48%) |       | 9 (64%)  | 5 (38%)   |       |
| High                                 | 2 (25%) | 11 (52%) |       | 5 (36%)  | 8 (61%)   |       |
| <b>Size (cm):</b>                    |         |          | 0.32  |          |           | 0.71  |
| 0–6                                  | 5 (62%) | 10 (48%) |       | 7 (50%)  | 8 (61%)   |       |
| 6–10                                 | 0 (0%)  | 5 (24%)  |       | 4 (29%)  | 2 (15%)   |       |
| >10                                  | 3 (37%) | 6 (29%)  |       | 3 (21%)  | 3 (23%)   |       |
| <b>Number of mitosis:</b>            |         |          | 0.044 |          |           | 0.13  |
| 0–10 MPF                             | 7 (87%) | 9 (43%)  |       | 10 (71%) | 5 (38%)   |       |
| >10 MPF                              | 1 (12%) | 12 (57%) |       | 4 (29%)  | 8 (61%)   |       |
| <b>Location:</b>                     |         |          | 0.038 |          |           | 0.054 |
| Gastric                              | 2 (25%) | 15 (71%) |       | 5 (36%)  | 10 (77%)  |       |
| Others                               | 6 (75%) | 6 (29%)  |       | 9 (64%)  | 3 (23%)   |       |
| <b>Age:</b>                          |         |          | 0.38  |          |           | 0.69  |
| 0–60 years                           | 5 (71%) | 9 (43%)  |       | 7 (54%)  | 5 (38%)   |       |
| >60 years                            | 2 (29%) | 12 (57%) |       | 6 (46%)  | 8 (61%)   |       |
| <b>Diagnostic delay (months):</b>    |         |          | 0.68  |          |           | 0.25  |
| 0–1                                  | 5 (62%) | 10 (48%) |       | 10 (71%) | 6 (46%)   |       |
| >1                                   | 3 (37%) | 11 (52%) |       | 4 (29%)  | 7 (54%)   |       |
| <b>Exon 11 mutated:</b>              |         |          | 0.12  |          |           | 0.22  |
| No                                   | 4 (67%) | 19 (95%) |       | 9 (75%)  | 12 (100%) |       |
| Yes                                  | 2 (33%) | 1 (5%)   |       | 3 (25%)  | 0 (0%)    |       |
| <b>KIT expression:</b>               |         |          | 0.21  |          |           | 0.018 |
| ≤10%                                 | 4 (50%) | 5 (24%)  |       | 9 (64%)  | 2 (15%)   |       |
| Absolute negative                    | 4 (50%) | 16 (76%) |       | 5 (36%)  | 11 (85%)  |       |
| <b>Subtype:</b>                      |         |          | 0.2   |          |           | 0.054 |
| Epithelioid                          | 5 (62%) | 6 (29%)  |       | 9 (64%)  | 3 (23%)   |       |
| Others                               | 3 (37%) | 15 (71%) |       | 5 (36%)  | 10 (77%)  |       |
| <b>Expression group<sup>a</sup>:</b> |         |          | 0.2   |          |           | 0.046 |
| I                                    | 5 (62%) | 6 (29%)  |       | 8 (57%)  | 2 (15%)   |       |
| II                                   | 3 (37%) | 15 (71%) |       | 6 (43%)  | 11 (85%)  |       |

<sup>a</sup>I – *KIT/PDGFR $\alpha$ /DOG1* positive; II – *IGF1R* positive. *N* = 27.
